# Supplementary material for: Microscopic Understanding of Interfacial Performance and Antifoaming Mechanism of REP Type Block Polyether Nonionic Surfactants
Source: MDPI journal article supplement (doi:10.3390/molecules29081816), 2024-04-17
Supplement: s1 [file s1]

## **Supplementary Information**

# **Microscopic Understanding of Interfacial Performance and Antifoaming Mechanism of REP Type Block Polyether Nonionic Surfactants**

**Yifei Zhao, Chunlong Xue, Deluo Ji, Weiqian Gong, Yue Liu and Ying Li \***

Key Lab. of Colloid and Interface Chemistry of State Education Ministry, School of  
Chemistry and Chemical Engineering, Shandong University, Jinan 250100, China

\* Correspondence: [yingli@sdu.edu.cn](mailto:yingli@sdu.edu.cn)

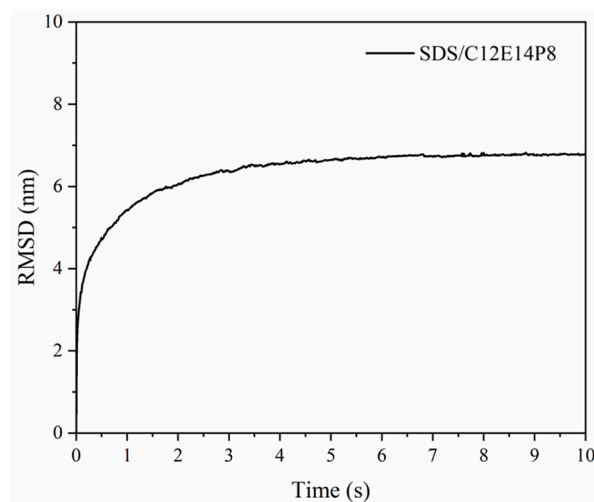

**Figure S1.** RMSD of SDS/C12E14P8 binary compounding system.

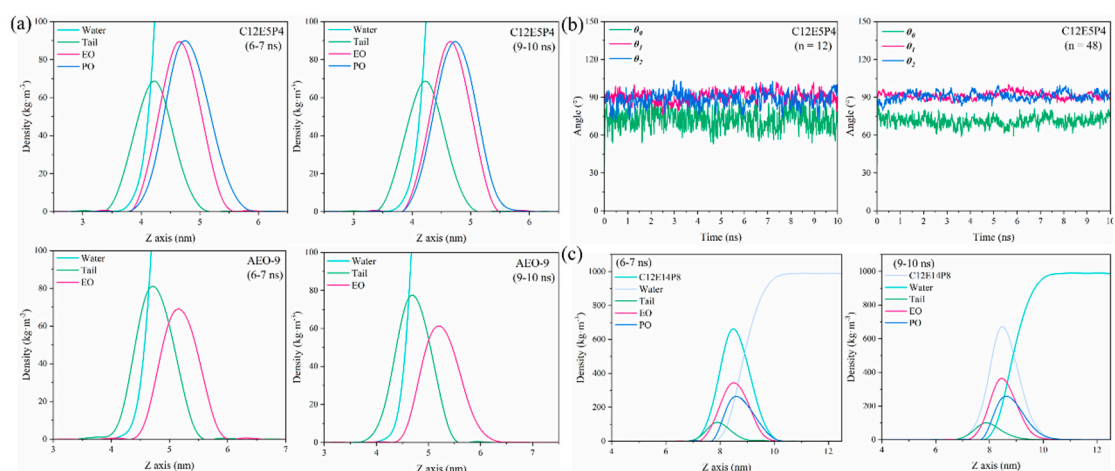

**Figure S2.** (a) Density distributions of AEO-9 and C12E5P4 ( $n=48$ ) at 6–7 ns and 9–10 ns, respectively; (b) The change of inclination Angle of C12E5P4 with simulation time at two concentrations of  $n=12$  and  $n=48$ ; (c) Density distributions of C12E14P8 at 6–7 ns and 9–10 ns, respectively.

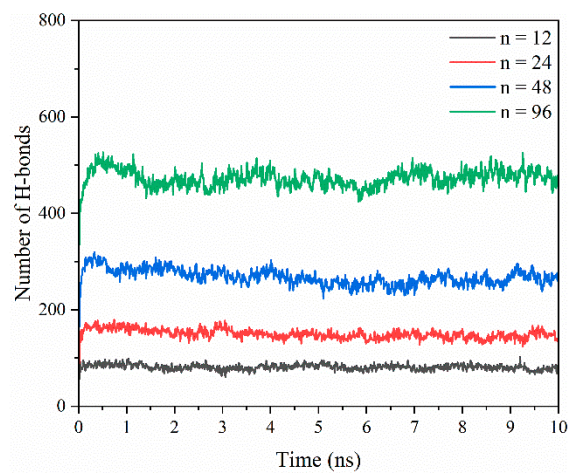

**Figure S3.** The total number of hydrogen bonds in C12E5P4 system with different molecular number changes with simulation time.

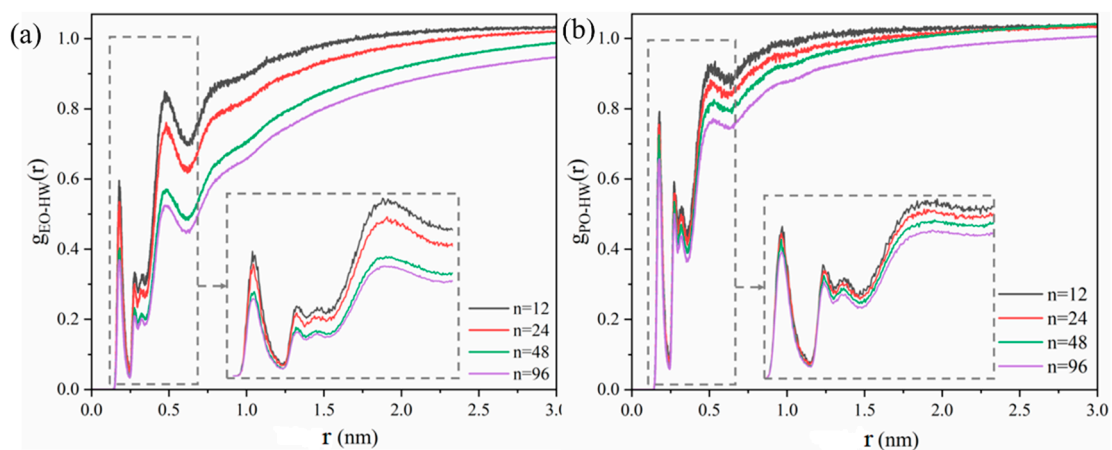

**Figure S4.** Radial distribution functions of ether groups and water in (a) EO groups and (b) PO groups in C12E5P4 systems under different concentrations.

**Table S1.** Summaries of simulated pure polyether systems.

| System          | Number of<br>water | Number of<br>polyether | Size of simulated box    |
|-----------------|--------------------|------------------------|--------------------------|
| C12E5P4 (n=12)  | 33400              | 12                     | $10 \times 10 \times 18$ |
| C12E5P4 (n=24)  | 33400              | 24                     | $10 \times 10 \times 18$ |
| C12E5P4 (n=48)  | 33400              | 48                     | $10 \times 10 \times 18$ |
| C12E5P4 (n=96)  | 33400              | 96                     | $10 \times 10 \times 18$ |
| AEO-9 (n=12)    | 33400              | 12                     | $10 \times 10 \times 18$ |
| AEO-9 (n=48)    | 33400              | 48                     | $10 \times 10 \times 18$ |
| C12E14P8 (n=48) | 33400              | 48                     | $10 \times 10 \times 27$ |

**Table S2.** Summaries of simulated SDS system and SDS/C12E14P8 system.

| System       | Number<br>of SDS | Number of<br>C12E14P8 | Number<br>of water | Number<br>of Na <sup>+</sup> | Size of<br>simulated box |
|--------------|------------------|-----------------------|--------------------|------------------------------|--------------------------|
| SDS          | 192              | -                     | 33208              | 192                          | $10 \times 10 \times 15$ |
| SDS/C12E14P8 | 192              | 48                    | 33208              | 192                          | $10 \times 10 \times 27$ |

**Table S3.** The number of hydrogen bonds formed between sulfuric acid groups and water in different systems at 298 K.

| System       | Number of H-bonds (SO-HW) |
|--------------|---------------------------|
| SDS          | 1346.3                    |
| SDS/C12E14P8 | 1126.3                    |
